# Supplementary material
Source: publisher figshare collection journal article supplement (https://gsajournals.figshare.com/articles/dataset/_/14069669)
Supplement: Supplementary file 1 [file 1]

## Sheet: Sheet1
Table S5. Full BUSCO table for assembled Hermetia illucens and Diptera genome assemblies.
Species	BUSCO Insecta										BUSCO Diptera
	Complete		Single-copy		Duplicated		Fragmented		Missing		Complete		Single-copy		Duplicated		Fragmented		Missing
	%	n	%	n	%	n	%	n	%	n	%	n	%	n	%	n	%	n	%	n
Hermetia illucens*	98.6	1635	97.8	1622	0.8	13	0.5	8	0.9	15	92.6	2592	92.2	2581	0.4	11	4	112	3.4	95
Hermetia illucens (GCA_009835165.1)	98.9	1640	91.1	1510	7.8	129	0.6	10	0.5	8	93.6	2620	87	2435	6.6	185	3.7	104	2.7	76
Drosophila melanogaster ( GCA_000001215.4)	99.7	1653	99	1641	0.7	12	0.2	3	0.1	2	98.7	2762	98.2	2748	0.5	14	0.8	21	0.5	16
Drosophila virilis (GCA_000005245.1)	99.1	1643	98.1	1626	1	17	0.4	7	0.5	8	98.4	2754	98	2743	0.4	11	0.9	24	0.7	21
Musca domestica (GCA_000371365.1)	98.6	1635	96.9	1607	1.7	28	0.4	7	1	17	97.5	2729	96.0	2686	1.5	43	1.6	45	0.9	25
Stomoxys calcitrans (GCA_001015335.1)	98.4	1631	97.7	1620	0.7	12	1	17	0.6	10	96.7	2706	96.2	2692	0.5	14	2.1	58	1.2	35
Glossina morsitans morsitans (GCA_001077435.1)	98.9	1640	96.6	1602	2.3	38	0.6	10	0.5	8	96.5	2703	95.7	2680	0.8	23	2.4	67	1.1	29
Anopheles gambiae (GCA_001542645.1)	89.4	1482	85.7	1421	3.7	61	7.4	123	3.2	53	71.6	2002	69.7	1950	1.9	52	16.0	449	12.4	348
Aedes aegypti (GCA_002204515.1)	98.9	1640	94.5	1567	4.4	73	0.4	7	0.7	12	96.7	2706	92.9	2601	3.8	105	1.8	50	1.5	43
Culex quinquefasciatus (GCA_000209185.1)	96.7	1603	91.8	1522	4.9	81	0.8	13	2.5	41	93.9	2626	91.0	2546	2.9	80	3.2	90	2.0	83
BUSCO ‘insecta_odb9’ and ‘diptera_odb9’ core gene sets used for analysis. * denotes the reported assembly iHerIll of this manuscript. Reference assemblies obtained from NCBI genome database.
