# Supplementary material
Source: publisher figshare collection journal article supplement (https://gsajournals.figshare.com/articles/dataset/_/14069669)
Supplement: Supplementary file 1 [file 1]

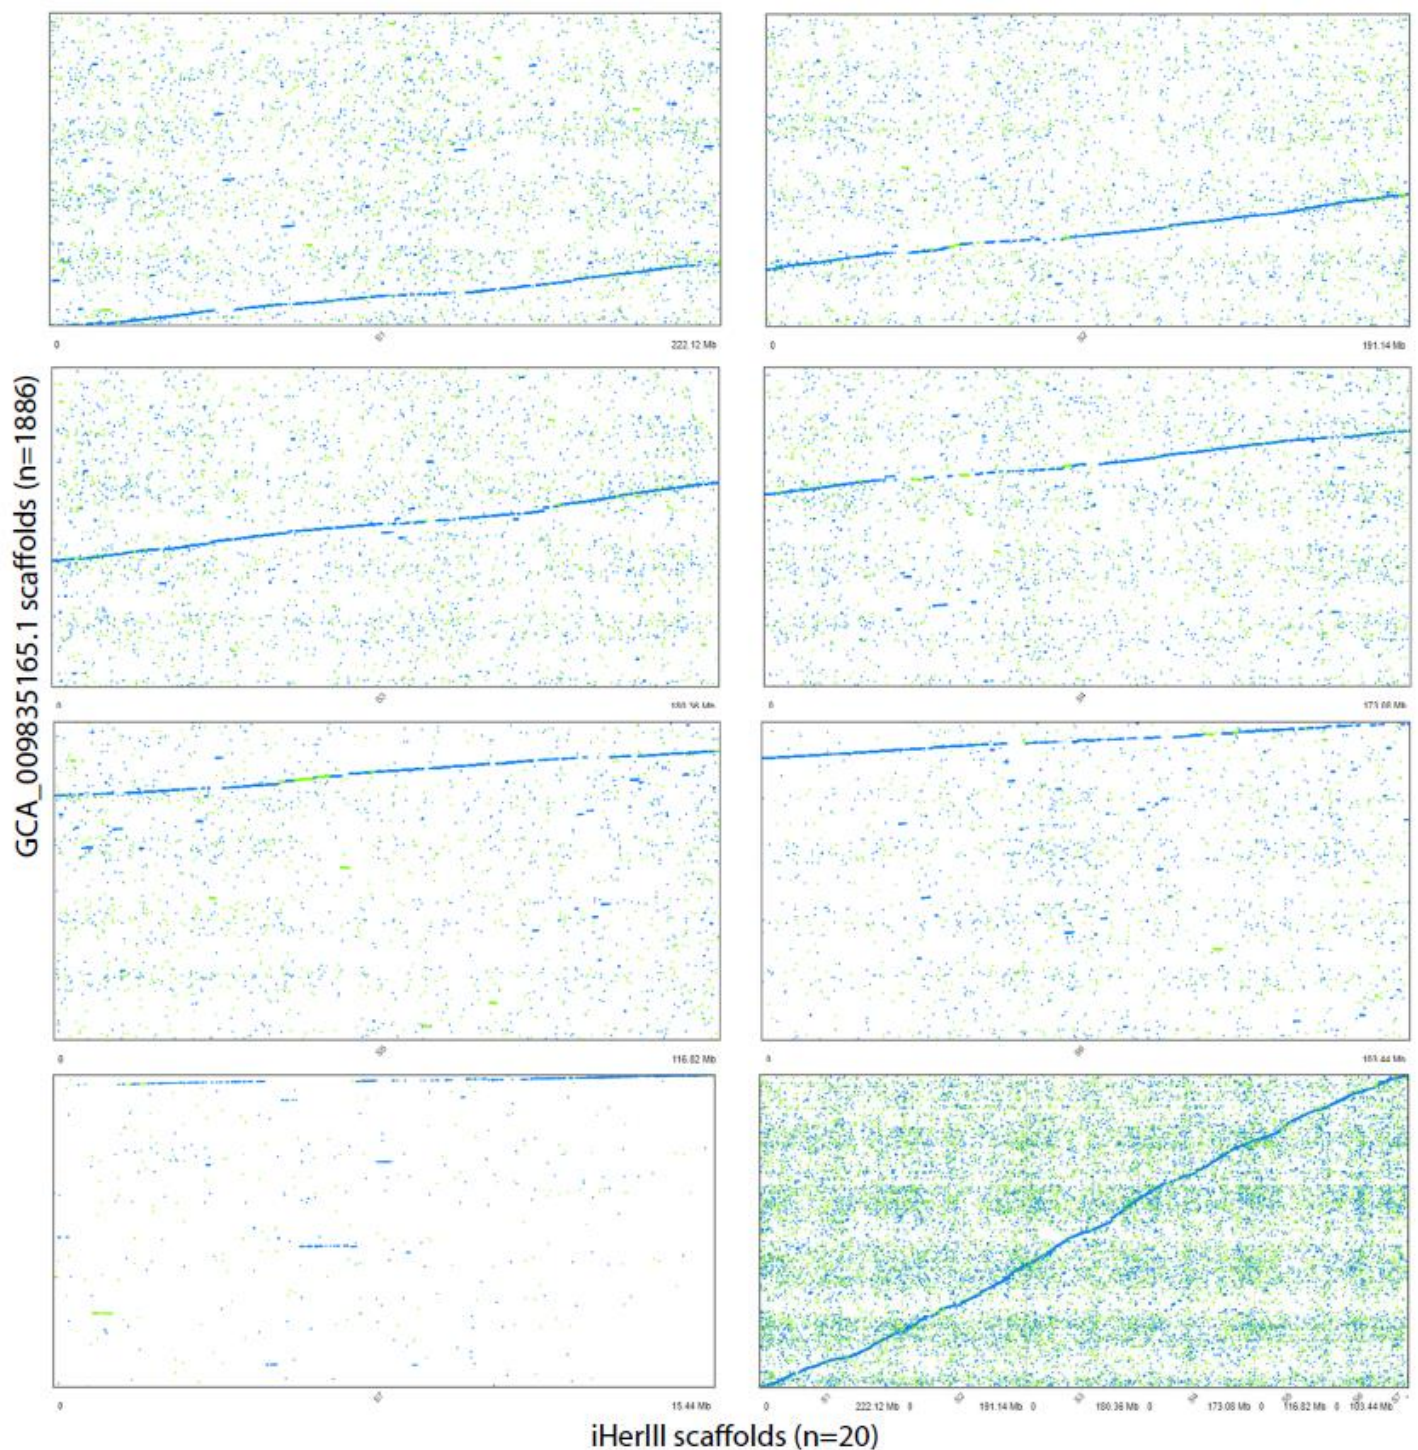

**Figure S4. Whole genome alignment of *Hermetia illucens* GCA\_009835165.1 and iHerIII assemblies.** Chromosome alignment of GCA\_009835165.1 scaffolds to the iHerIII assembly both per chromosome (top left to bottom left) and whole genome overview (bottom right). Unique forward alignments = blue, unique reverse alignments = orange and repetitive sequences = green.
