# Supplementary material
Source: publisher figshare collection journal article supplement (https://gsajournals.figshare.com/articles/dataset/_/14069669)
Supplement: Supplementary file 2 [file 1]

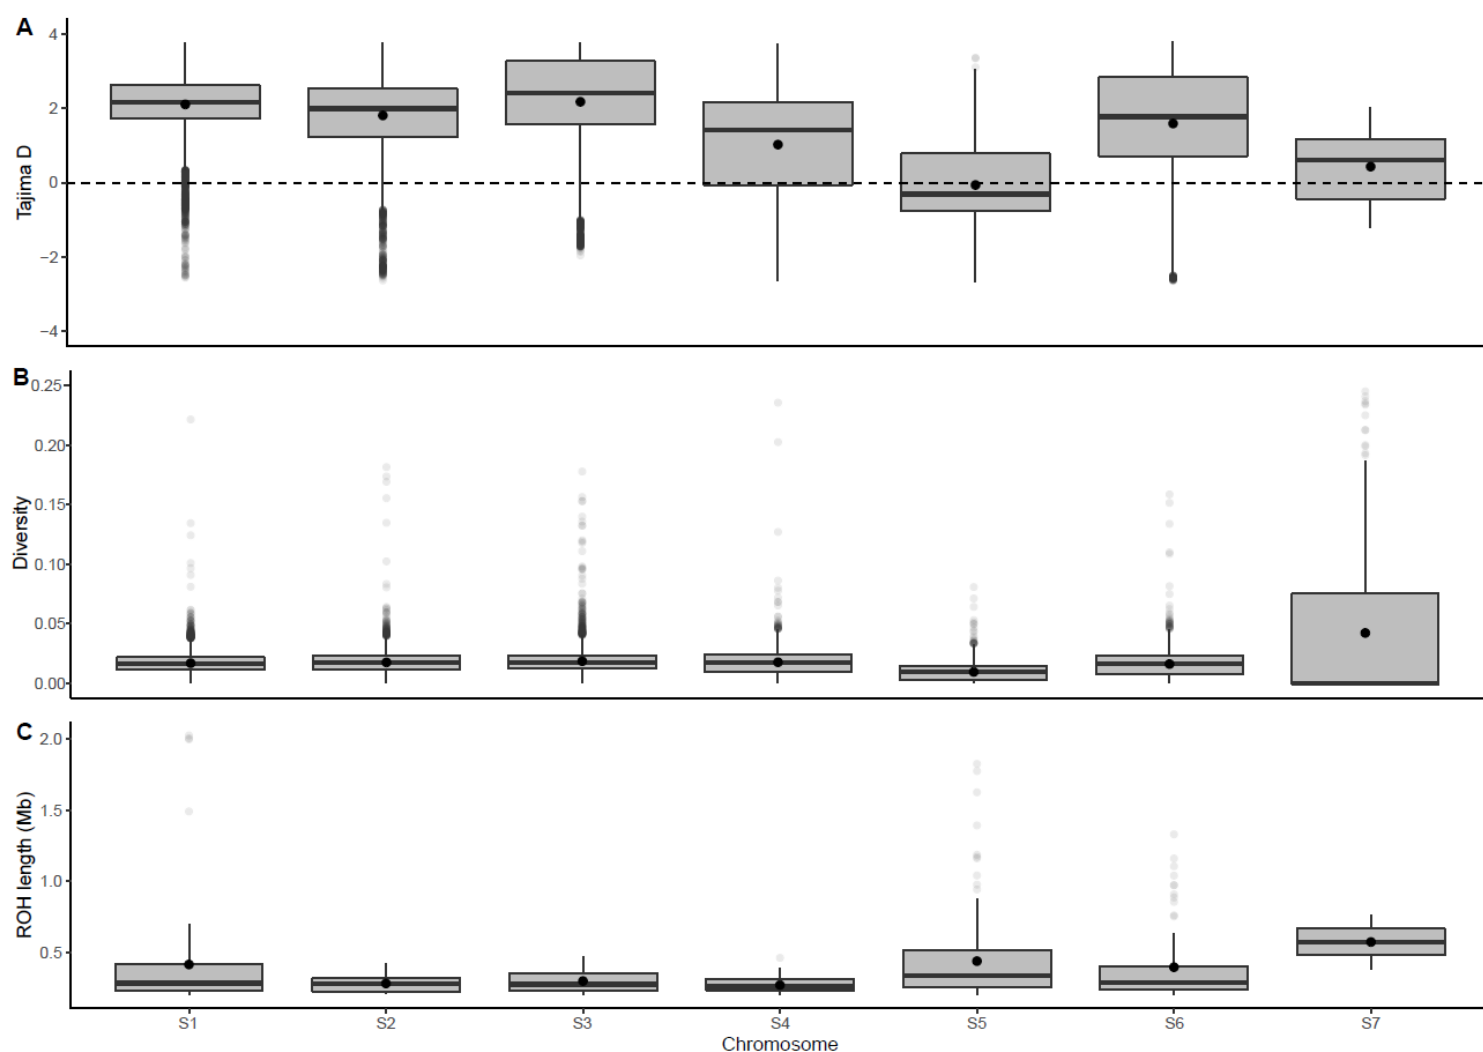

**Figure S5. Genome wide diversity, Tajima D and ROH analysis of the sampled *Hermetia illucens* EVE population.** Tajima D (A), nucleotide diversity (B) and Runs of Homozygosity (ROH) values for each of the seven assembled chromosomes. Contigs < 1 Mb (n=13) not included.

**Supplementary Table 7. Genomic diversity and inbreeding of the sampled *Hermetia illucens* EVE population.** Statistics describing mean *H. illucens* sequence diversity, Tajima D values, ROH counts, ROH mean lengths and inbreeding coefficients of the sampled population. Reported statistics generated on a per chromosome basis and genome wide. <sup>a</sup> Final genome wide  $F_{ROH}$  excludes identified sex chromosome seven (S7).

| Query sequence | Pi ( $\pi$ ) | Tajima D | ROH (#) | ROH mean length (kb) | $F_{ROH}$ |
|----------------|--------------|----------|---------|----------------------|-----------|
| S1             | 0.017        | 2.1      | 68      | 415.43               | 0.011     |
| S2             | 0.018        | 1.802    | 37      | 282.13               | 0.005     |
| S3             | 0.019        | 2.170    | 21      | 299.14               | 0.003     |
| S4             | 0.018        | 1.019    | 38      | 270.68               | 0.005     |
| S5             | 0.010        | -0.066   | 193     | 439.10               | 0.060     |
| S6             | 0.016        | 1.586    | 85      | 396.49               | 0.027     |
| S7             | 0.072        | 0.428    | 2       | 573.86               | 0.040     |
| Genome Wide    | 0.017        | 1.576    | 444     | 393.81               | 0.019     |
