# Supplementary material
Source: publisher figshare collection journal article supplement (https://gsajournals.figshare.com/articles/dataset/_/14069669)
Supplement: Supplementary file 3 [file 1]

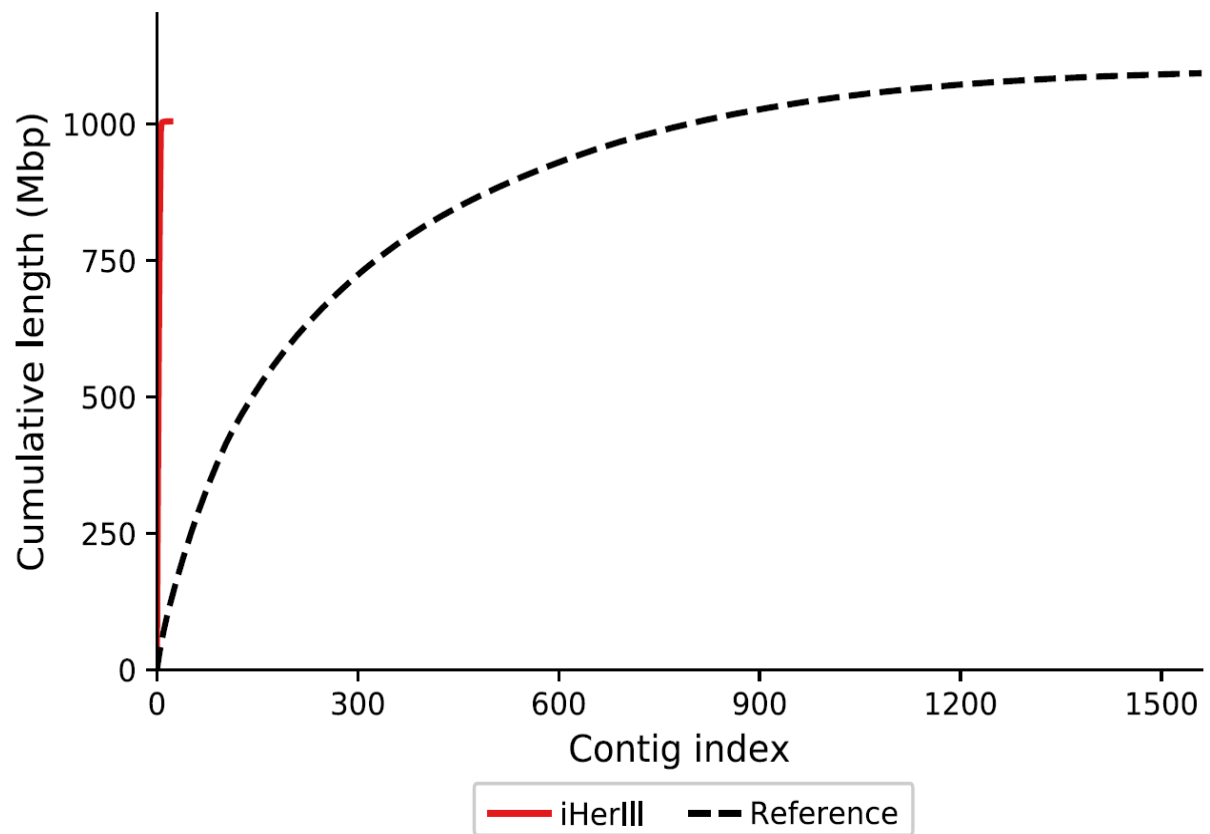

**Figure S3. Cumulative scaffold length comparing *Hermetia illucens* assembly contiguity.** A contiguous assembly is observed in the iHerIII assembly when compared to GCA\_009835165.1 as a reference assembly. Contiguity represented by a vertical line and minimal horizontal tail showing cumulative length is contained within a minimum contig index of the iHerIII assembly.
