# Supplementary material
Source: publisher figshare collection journal article supplement (https://gsajournals.figshare.com/articles/dataset/_/14069669)
Supplement: Supplementary file 4 [file 1]

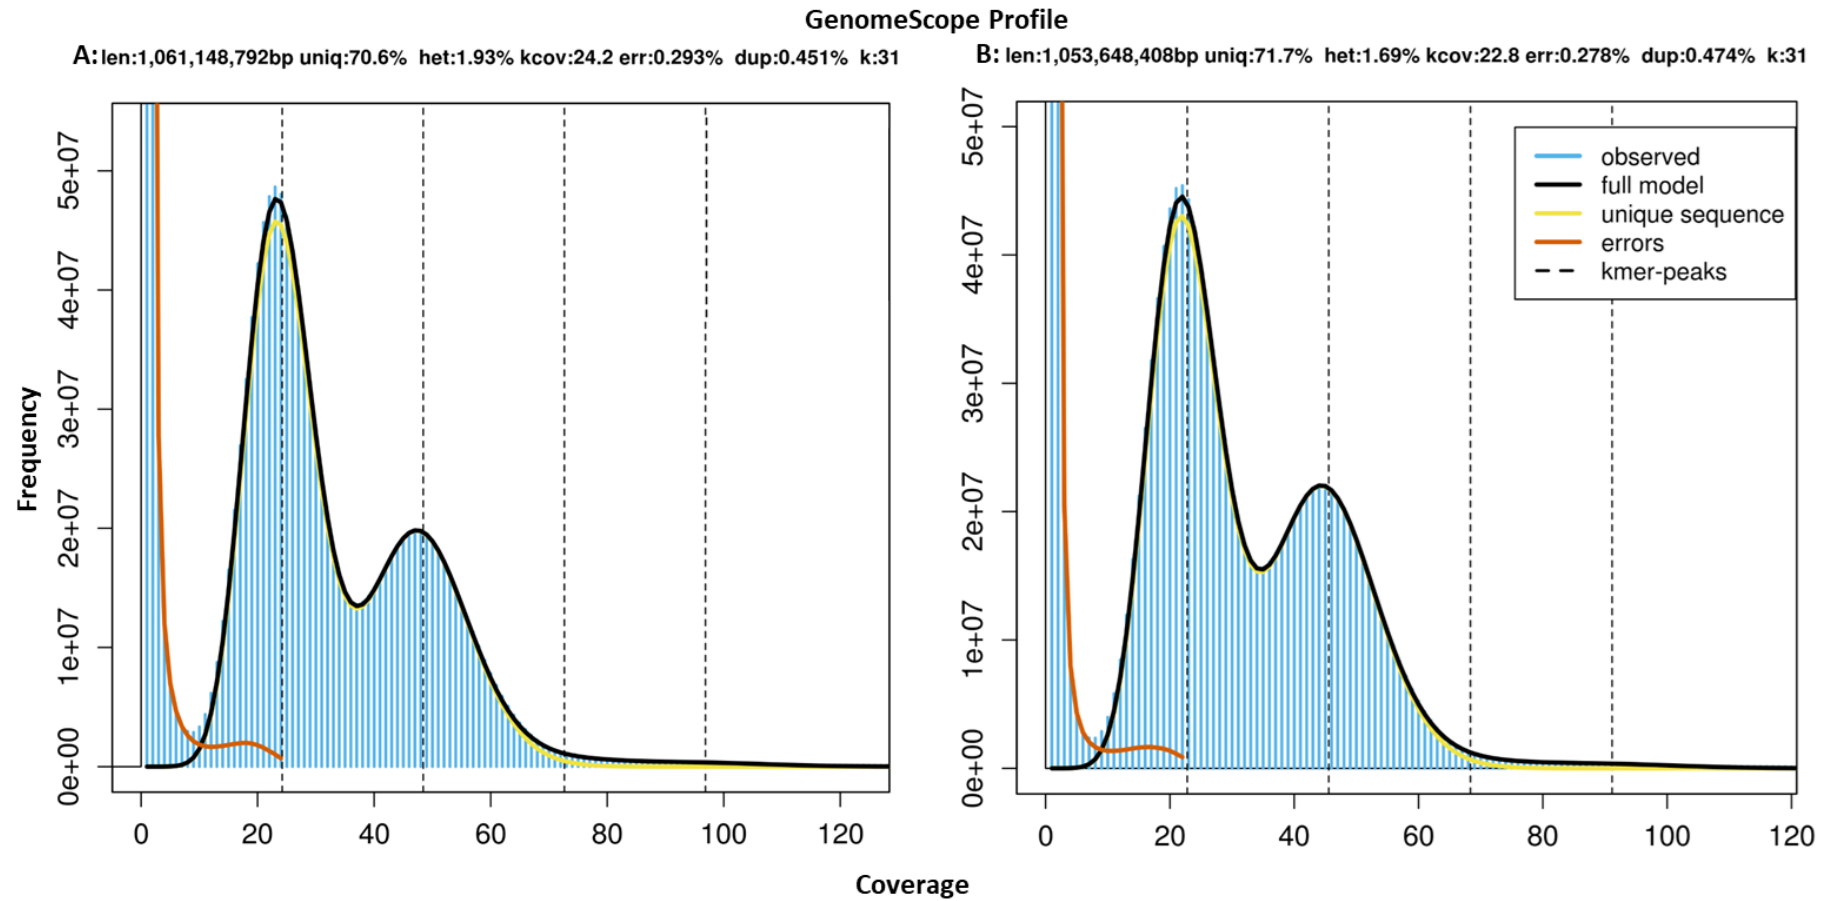

**Figure S1. GenomeScope profile of *Hermetia illucens* genome using surveyed adults.** Illumina WGS data of both a male (A) and female (B) *H. illucens* adult. Provisional genome size estimate is 1.06 Gb, repeat content of 46.25% and predicted mean heterozygosity of 1.8%.
