# Supplementary material
Source: publisher figshare collection journal article supplement (https://gsajournals.figshare.com/articles/dataset/_/14069669)
Supplement: Supplementary file 5 [file 1]

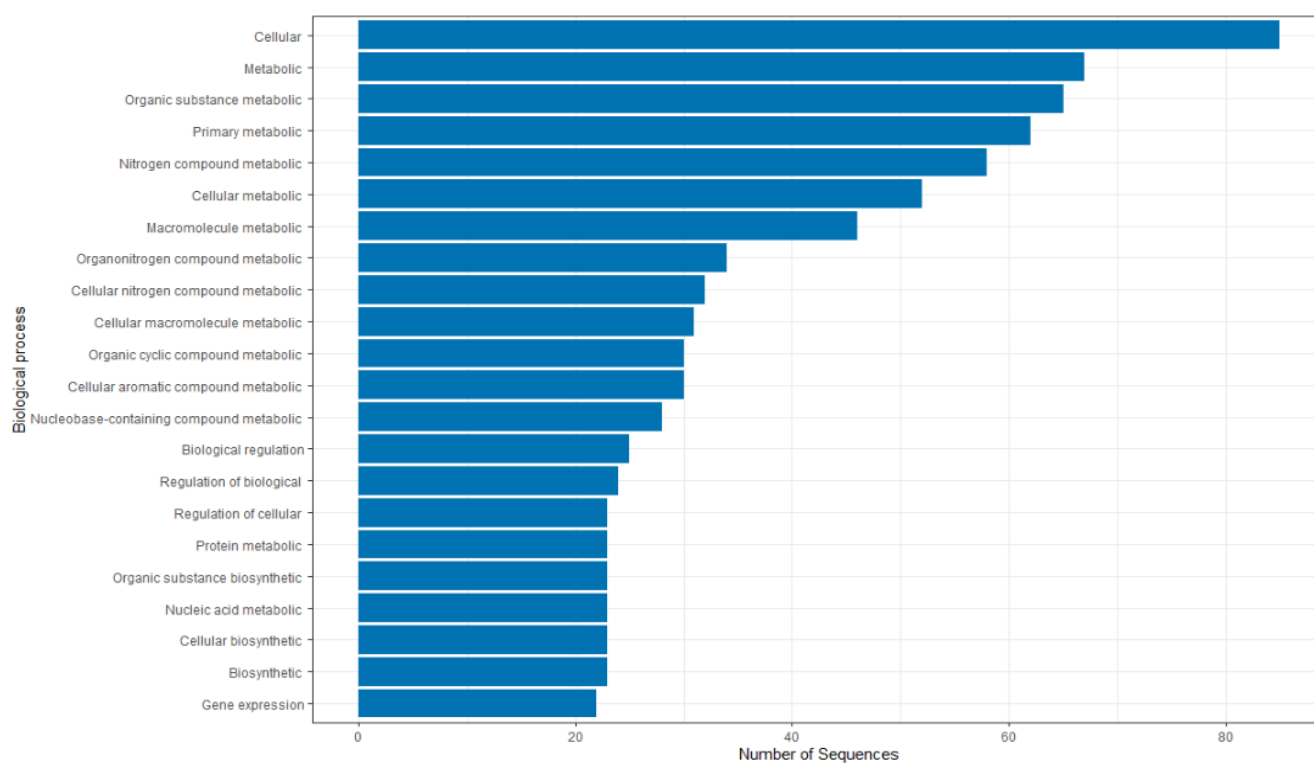

**Figure S6. Gene Ontology (GO) distribution of biological processes in genomic region of interest of the *Hermetia illucens* re-sequenced population.** GO distributions of the chromosome five 17.6 Mb region of interest containing 241 genes.
