# Supplementary material
Source: publisher figshare collection journal article supplement (https://gsajournals.figshare.com/articles/dataset/_/14069669)
Supplement: Supplementary file 7 [file 1]

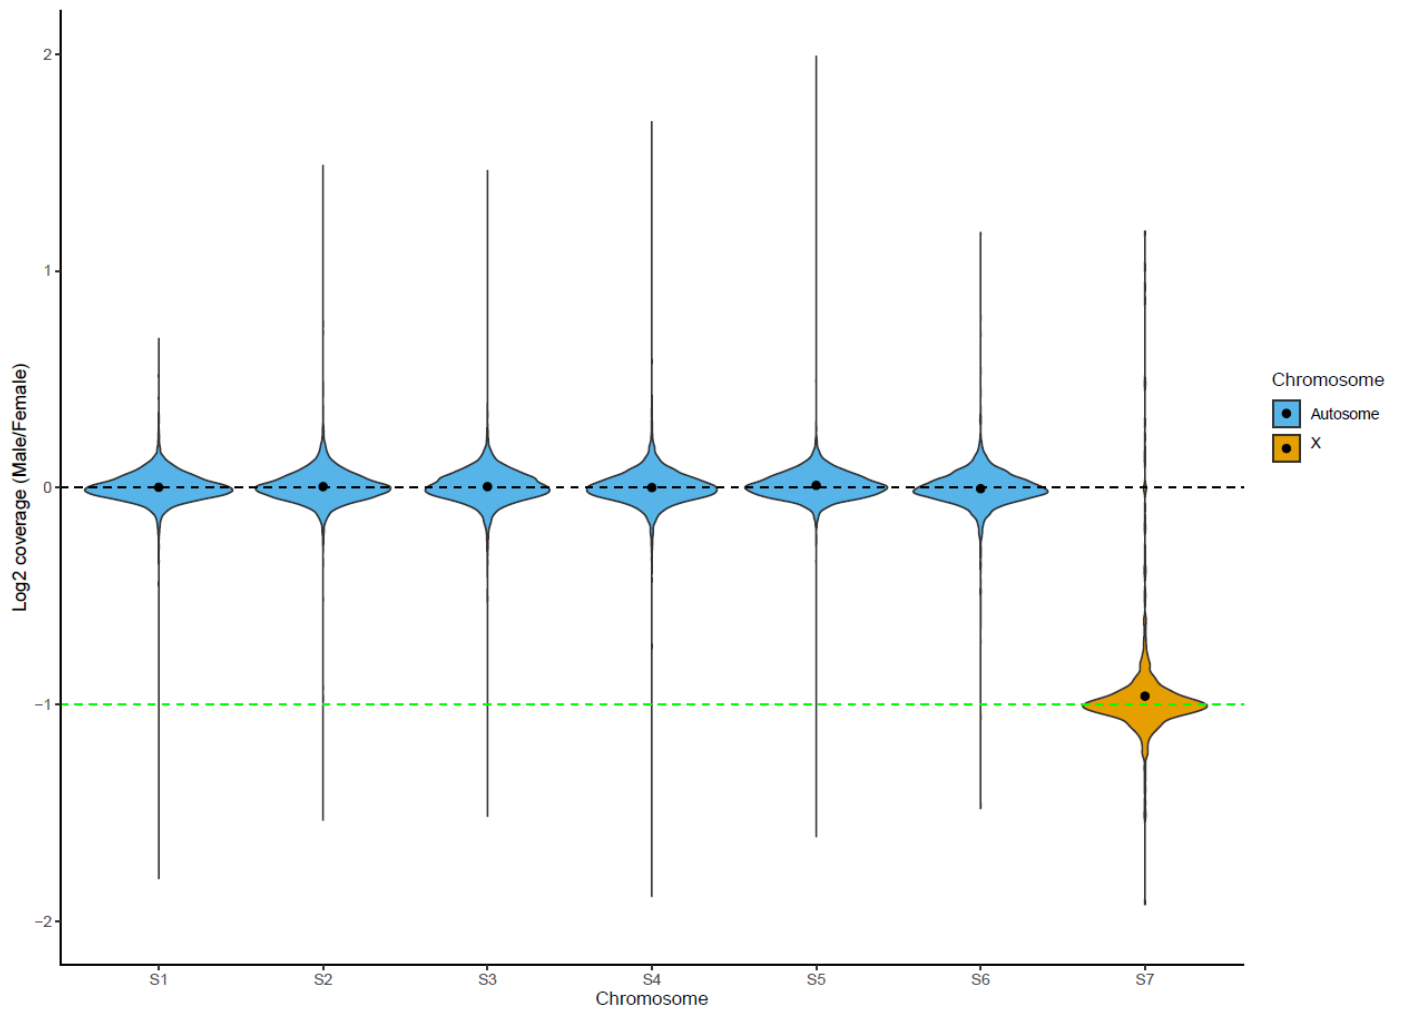

**Figure S7. Sex chromosome identification of the *Hermetia illucens* assembly.** Log<sub>2</sub> coverage (male/female) of mapped male (n=5) and female (n=7) whole-genome BGI re-sequencing data. Chromosome seven reveals half the coverage expected of an autosome resembling that of an X sex chromosome in the *H. illucens* assembly.
